# Supplementary material
Source: ML conference proceedings conference paper supplement (https://proceedings.neurips.cc/paper_files/paper/2021/hash/256bf8e6923a52fda8ddf7dc050a1148-Abstract.html)
Supplement: Supplementary file 1 [file 256bf8e6923a52fda8ddf7dc050a1148-Supplemental.zip]

Archive with 9 entries (8 files):
- supplementary/
- supplementary/.DS_Store
- __MACOSX/supplementary/._.DS_Store
- supplementary/appendix.pdf
- __MACOSX/supplementary/._appendix.pdf
- supplementary/cheetah-run.mp4
- __MACOSX/supplementary/._cheetah-run.mp4
- supplementary/checklist.pdf
- __MACOSX/supplementary/._checklist.pdf
